# Supplementary material for: Complex expression dynamics and robustness in C. elegans insulin networks
Source: HighWire-hosted journal article supplement (doi:10.1101/gr.150466.112), 2013-03-28
Supplement: Supplemental_Material_Legends.docx [file Supplemental_Material_Legends.docx]

**­­SUPPLEMENTAL FIGURE LEGENDS**

**Supplemental Table S1.** Previously published insulin phenotypes. Phenotypes reported in this table are compared to wild type (N2) and only include results from mutations, deletions, RNAi or overexpression in N2 backgrounds. References are indicated by superscript letters. For phenotypes in other mutant backgrounds (such as *daf-2*), see column titled “Other.”

**Supplemental Table S2.** Examination of dauer phenotypes of insulin mutants. Dauer phenotype data from Figure 1. Top – Daf-c assays. The total number of non-dauers and dauers from duplicate experiments. Data are normalized to wild type (N2) dauer formation. Bottom – Daf-d assays. Data represents the average from two replicates where starvation-induced dauers were counted after 1% SDS survival. Data are normalized to wild type (N2) dauer formation. *n.d.* = not determined.

**Supplemental Table S3**. Previously published insulin expression patterns. Expression in a tissue is indicated by blue if it is observed only in this study, orange if only in other recorded studies, or green if observed in both. A ***** indicates expression patterns observed that were not previously published (see Supplemental Fig. S2). Tissues are assigned as follows: I, intestine; DTC, distal tip cell; GS, gonadal sheath; M, muscle; HN, head neurons; BN, body neuron; TN, tail neuron; VNC, ventral nerve cord; P, pharynx; H, hypodermis; SU, spermatheca/uterine valve; C, coelomocytes; S, spermatheca; V, vulva/vulva muscle/vulva neurons; U, uterus; R, rectum.

**Supplemental Table S4**. Insulin expression annotation. GFP expression was examined in each *Pins::GFP* line throughout the animal. Expression in a tissue is indicated by a “1”; whereas, no expression is indicated by a “0”. Tissues are assigned as follows: I, intestine, PI, partial intestine; DTC, distal tip cell; GS, gonadal sheath; HM, head muscle; BM, body muscle; VM, vulva muscle; EM, enteric muscle; SN, sensory head neuron; RIM, ring interneuron/motor head neuron; PN, pharyngeal head neuron; BN, body neuron; VN, vulva neuron; TN, tail neuron; VNC, ventral nerve cord; P, pharynx; SU, spermatheca/uterine valve; C, coelomocytes; S, spermatheca; U, uterus; R, rectum.

**Supplemental Table S5**. Ranking of TsOC scores for each transgenic strain throughout development. “Gene pair” describes the pair-wise comparison between insulins. TsOC scores for all pair-wise combinations are ranked by life stage. Life stages are defined as: L1, L2, L3, L4, Young Adult and Adult (~3-4 day old adult with eggs). Each pairwise combination has been averaged across all 6 stages (AVG of ALL).

**Supplemental Table S6.** Primer sequences for all primers used for genotyping or performing RT-PCR experiments (see Supplemental Methods).

**Supplemental Figure S1**. Insulin expression in males. *(A) Pins-19::GFP* transgenic strains show GFP expression in head neurons (arrowhead). *(B) Pins-31::GFP* transgenic strains show GFP expression in the gonad (arrowhead).

**Supplemental Fig. S2.** Previously published *Pins::GFP* transgenic strains illustrating GFP expression in the vulva (white arrowhead). This tissue expression was missed in previous publications.

**Supplemental Figure S3**. Insulin expression networks for each developmental stage. Bipartite networks of spatial expression of 36 insulins in the following stages of *C. elegans* hermaphrodites: L1, L2, L3, L4, Adult (~3-4 day old adult with eggs). See Fig. 3 for Young Adult stage. Circles represent insulins; squares represent cells/tissues as follows: S, spermatheca; C, ceolomocytes; R, rectum; HM, head muscle; VM, vulva muscle; DTC, distal tip cell; U, uterus; BM, body muscle; H, hypodermis; EM, enteric muscle; P, pharynx; BN, body neuron(s); VN, vulva neuron(s); TN, tail neuron(s); VNC, ventral nerve cord; HN, head neuron; PN, pharyngeal neuron(s); RIM, ring/intermotor neuron(s); SN, sensory neuron(s); I, intestine. An edge defines GFP expression of an insulin in that tissue. The network is organized as follows: (top to bottom) insulins with no neuronal expression; non-neuronal tissues (excluding the intestine); insulins with neuronal and non-neuronal tissue expression; neuronal tissues and the intestine, insulins with only neuronal and/or intestinal expression.

**Supplemental Figure S4.** Tissue-centered dartboards illustrating insulin expression. Each ring represents a developmental stage, starting from the center: larval stages L1, L2, L3 and L4, Young Adult and Adult (~3-4 day old adult with eggs). Each slice represents an insulin with strong GFP (black), weak GFP (gray) or no GFP (white) expression. Tissues are assigned as follows: HN, head neurons; I, intestine; HM, head muscle; TN, tail neuron; VNC, ventral nerve cord; BN, body neuron; R, rectum; C, coelomocytes; VN, vulva neuron; VM, vulva muscle; DTC, distal tip cell; P, pharynx; S, spermatheca; U, uterus; H, hypodermis; EM, enteric muscle; BM, body muscle; SU, spermatheca/uterine valve; GS, gonadal sheath.

**Supplemental Figure S5**. Environmental effects on insulin expression. *(A)* Controls for conditional expression changes. Environmental conditions (see Methods) were tested to ensure that each would illicit a biological response from the animal. A reporter transgenic strain harboring a gene previously illustrated to respond to the respective condition was used as follows: *Phsp-4::GFP* for heat stress, *Pgst-4::GFP* for paraquat, *Pacdh-1::GFP* for starvation, *daf-16a::GFP* for glucose. *(B) ins-4* stage-specific responses to heat stress. Under normal conditions (no stress), L4 and young adult stage *Pins-4::GFP* hermaphrodites do not express GFP in the hypodermis (top left and top right). After heat stress, GFP is expressed in the hypodermis of L4 (bottom left) but not young adult (bottom right) hermaphrodites (white arrowheads).

**Supplemental Figure S6.** Gene-centered dartboards illustrating insulin expression. Each ring represents a developmental stage or environmental condition, starting from the center: larval stages L1, L2, L3 and L4, Young Adult and Adult (~3-4 day old adult with eggs), heat stress, dauer, starvation and aging. Each slice represents a tissue with GFP expression (black), no GFP (white), GFP increase (red) or GFP decrease (blue). The number in the center indicates the insulin (*i.e.* 1 = *ins-1*; d28 = *daf-28*). Tissues are assigned as follows: HN, head neurons; I, intestine; HM, head muscle; TN, tail neuron; VNC, ventral nerve cord; BN, body neuron; R, rectum; C, coelomocytes; VN, vulva neuron; VM, vulva muscle; DTC, distal tip cell; P, pharynx; S, spermatheca; U, uterus; H, hypodermis; EM, enteric muscle; BM, body muscle; SU, spermatheca/uterine valve; GS, gonadal sheath.

**Supplemental Fig. S7.** Phenotypic analyses of insulin mutants. Lifespan phenotypes of *ins-8(tm4144)* (red) and *ins-7(tm1907)* (green) lifespan as compared to wild type (N2) (blue). Lifespans were performed in duplicate at 20°C. Mean and maximum lifespans are as follows: N2=16.5 ±1; 23 days; *ins-7(tm1907)*=18 ±2, 28 days; *ins-8(tm4144)*= 16 ±2, 23 days. Prism 5 was used to calculate and perform survival curve comparisons. Significance was determined using the log-rank (Mantel-Cox) test.

**SUPPLEMENTAL METHODS**

**Strains**

All strains were maintained at 15°C using standard *C. elegans* techniques (Stiernagle 2006). Males were generated by heat shocking L4 larvae at 30°C for 6 hours.

**RNAi**

Bacterial feeding of RNAi clones was performed as described (Fraser et al. 2000). Control (empty vector) and *unc-22* clones were used as negative and positive controls, respectively. Each clone was verified by PCR and sequence analysis.

**Dauer analyses**

For analysis of dauer constitutive phenotypes, wild type (N2) and mutant animals were grown on vector and *daf-2* RNAi for one generation at 25°C. Consistent with Dillin *et al* 2002, *daf-2* RNAi is not 100% efficient at generating dauers. Approximately 10 adults from the F1 progeny were added to new RNAi culture plates and allowed to lay eggs for 6-8 hours at 25°C. Plates containing eggs were incubated at 25°C and analyzed after 2-3 consecutive days by counting dauers and non-dauers. Dauers were determined by survival of 1% SDS treatment for 15 minutes. To test for a dauer defective phenotype, two young adult animals were placed on OP50 plates and left at 25°C or 27°C to reproduce. Plates were checked daily to examine the bacterial lawn. 3-4 days after no food remained, the number of animals on the plate were scored and then 1.5mL of 1% SDS was added to each plate. After 15 minutes, the number live thrashing animals (*i.e.* dauers) were counted. Assays were performed in duplicate.

**Genotyping**

The genotype of each transgenic line was confirmed by PCR (Supplemental Table S6), followed by DNA sequencing. One gravid animal was added to 5μL of solution containing 2μL 20mg/mL proteinase K and 100μL lysis buffer (30mM Tris pH8, 8mM EDTA, 100mM NaCl, 0.7% NP40, 0.7% Tween 20) and incubated at 60°C for 1hr followed by 95°C for 15 minutes. Each 50μL PCR reaction included 1μL dNTP, 5μL 10X Buffer, 0.4μL of each Fwd and Rev primers (at 25 μM), 0.2uL Taq polymerase, 1μL MgCl2, 32.4μL water, 10μL template obtained from worm lysis. PCR conditions included 34 cycles of (95°C for 2 minutes 45 seconds, 56° for 1 minute, 72°C for 3 minutes) followed by 68°C for 7 minutes, 10°C for 30 minutes.

**Quantitative RT-PCR**

For all qRT-PCR experiments, strains were maintained at 20°C and mixed late-L4/YA stage animals were used. Worms were collected and washed 2x with sterile 1x M9 buffer (3g KH2PO4, 6g Na2HPO4, 5g NaCl, 1mL 1M MgSO4, H2O to 1 liter; Sterilize by autoclaving). Supernatant was removed and 10x volume of TRIzol reagent (Invitrogen, USA) was added to the worm pellet. Pellet was frozen at -80°C until RNA extraction. Total RNA was purified by phenol:chloroform extraction and ethanol precipitation followed by column purification using a RNeasy Mini Kit (Qiagen, USA). The quality of RNA isolated was determined by checking the 28S and 18S RNA on an agarose gel and quantity measured by NanoDrop® ND-1000 Spectrophotometer. 1μg of total RNA was used to make cDNA using the SuperScript® III First Strand Synthesis Kit (Invitrogen, USA). The expression of *ins-7* and *ins-8* genes was checked by quantitative PCR using the SYBR® Green PCR Master Mix (Invitrogen, USA) and StepOnePlusTM Real-Time PCR System (Applied Biosystems, USA). Samples were analyzed three times in triplicate from two independent worm cDNA preps and two different cDNA sample dilutions. mRNA levels were normalized for *act-1* mRNA and expressed as log2 fold change compared to controls. Significance was determined by Student’s t-test. Primers used for RT-PCR experiments can be found in Supplemental Table S6.

**SUPPLEMENTAL REFERENCES**

*The following references are only used for supplemental methods and tables.*

Dillin A, Crawford DK, Kenyon C. 2002. Timing requirements for insulin/IGF-1 signaling in *C. elegans*. *Science* **298**(5594):830-4.

Fraser AG, Kamath RS, Zipperlen P, Martinez-Campos M, Sohrmann M, Ahringer J. 2000. Functional genomic analysis of *C. elegans* chromosome I by systematic RNA interference. *Nature* **408**(6810): 325-330.

Harris G, Korchnak A, Summers P, Hapiak V, Law WJ, Stein AM, Komuniecki P, Komuniecki R. 2011. Dissecting the serotonergic food signal stimulating sensory-mediated aversive behavior in *C. elegans*. *PLoS One* **6**(7):e21897

Hristova M, Birse D, Hong Y, Ambros V. 2005. The *Caenorhabditis elegans* heterochronic regulator LIN-14 is a novel transcription factor that controls the developmental timing of transcription from the insulin/insulin-like growth factor gene *ins-33* by direct DNA binding. *Molecular & Cellular Biology* **25**(24):11059-72

Kao G, Nordenson C, Still M, Rönnlund A, Tuck S, Naredi P. 2007. ASNA-1 positively regulates insulin secretion in *C. elegans* and mammalian cells. *Cell* **128**(3):577-87

Kodama E, Kuhara A, Mohri-Shiomi A, Kimura KD, Okumura M, Tomioka M, Iino Y, Mori I. 2006. Insulin-like signaling and the neural circuit for integrative behavior in *C. elegans*. *Genes & Development* **20**(21):2955-60.

Kawano T, Nagatomo R, Kimura Y, Gengyo-Ando K, Mitani S. 2006. Disruption of *ins-11*, a *Caenorhabditis elegans* insulin-like gene, and phenotypic analyses of the gene-disrupted animal. *Biosci Biotechnol Biochem* **70**(12):3084-7.

Kawli T, Tan MW. 2008. Neuroendocrine signals modulate the innate immunity of *Caenorhabditis elegans* through insulin signaling. *Nature Immunology* **9**(12):1415-24

Lin CH, Tomioka M, Pereira S, Sellings L, Iino Y, van der Kooy D. 2010. Insulin signaling plays a dual role in *Caenorhabditis elegans* memory acquisition and memory retrieval. *The Journal of neuroscience : the official journal of the Society* *for Neuroscience* **30**(23): 8001-8011.Malone EA, Thomas JH. 1994. A screen for nonconditional dauer-constitutive mutations in *Caenorhabditis elegans*. *Genetics* **136**(3):879-86

Matsunaga Y, Gengyo-Ando K, Mitani S, Iwasaki T, Kawano T. 2012. Physiological function, expression pattern, and transcriptional regulation of a *Caenorhabditis elegans* insulin-like peptide, INS-18. *Biochem Biophys Res Commun* **423**(3):478-83

Matsunaga Y, Nakajima K, Gengyo-Ando K, Mitani S, Iwasaki T, Kawano T. 2012. A *Caenorhabditis elegans* insulin-like peptide, INS-17: its physiological function and expression pattern. *Biosi Biotechnol Biochem* **76**(11):2168-72

McElwee J, Bubb K, Thomas JH. 2003. Transcriptional outputs of the *Caenorhabditis elegans* forkhead protein DAF-16. *Aging Cell* **2**(2):111-21

Stiernagle T. Maintenance of *C. elegans*. *Wormbook*, ed. The *C. elegans* Research Community, Wormbook, doi: 10.1895/wormbook.1.101.1, http://www.wormbook.org

Tomioka M, Adachi T, Suzuki H, Kunitomo H, Schafer WR, Iino Y. 2006. The insulin/PI 3-kinase pathway regulates salt chemotaxis learning in *Caenorhabditis elegans*. *Neuron* **51**(5):613-25
