# Supplementary material for: Complex expression dynamics and robustness in C. elegans insulin networks
Source: HighWire-hosted journal article supplement (doi:10.1101/gr.150466.112), 2013-03-28
Supplement: Supplemental_Table_S5.xlsx [file Supplemental_Table_S5.xlsx]

## Sheet: Sheet1
Gene Pair	L1 (no HN annot)	Gene Pair	L2	Gene Pair	L3	Gene Pair	L4	Gene Pair	YA	Gene Pair	AwEggs	Gene Pair	AVG of ALL
Top 50 pairs with highest TsOC scores
4:5	1	4:5	1	29:32	1	4:5	1	1:7	0.928571	38:9	1	4:5	0.890705
38:6	1	29:32	1	21:32	1	32:39	1	10:26	0.888889	16:6	1	14:38	0.888889
32:6	1	21:32	1	21:29	1	21:29	1	4:8	0.852071	1:7	0.923077	1:17	0.847495
32:38	1	21:29	1	16:6	1	16:6	1	17:4	0.852071	17:7	0.846154	4:8	0.841086
29:39	1	16:6	1	14:38	1	14:38	1	1:4	0.852071	1:4	0.840278	10:17	0.839964
25:6	1	14:38	1	12:35	1	12:35	1	1:17	0.852071	1:5	0.833333	12:35	0.829861
25:38	1	12:35	1	10:17	1	10:17	1	18:8	0.846154	1:10	0.833333	1:4	0.828811
25:32	1	1:5	0.9	4:5	0.9	1:8	1	18:4	0.846154	10:5	0.81	16:6	0.815972
20:6	1	1:4	0.9	1:4	0.9	5:8	0.909091	26:5	0.8	4:7	0.775641	1:5	0.798847
20:38	1	1:17	0.9	1:17	0.9	4:8	0.909091	7:8	0.791209	5:7	0.769231	21:29	0.796296
20:32	1	5:8	0.888889	1:10	0.9	1:5	0.909091	4:7	0.791209	10:7	0.769231	18:4	0.792415
20:25	1	4:8	0.888889	4:8	0.888889	1:4	0.909091	17:7	0.791209	4:8	0.757576	1:7	0.789206
16:39	1	26:5	0.888889	1:5	0.81	18:5	0.9	5:8	0.769231	17:4	0.757576	18:5	0.787542
16:29	1	26:4	0.888889	5:8	0.8	18:4	0.9	4:5	0.769231	1:8	0.757576	5:8	0.783171
14:6	1	17:26	0.888889	18:5	0.8	7:8	0.826446	15:4	0.769231	1:17	0.757576	1:10	0.776351
14:38	1	1:8	0.8	1:8	0.8	1:7	0.826446	15:17	0.769231	35:6	0.75	17:4	0.761279
14:32	1	1:7	0.8	1:7	0.8	18:8	0.818182	1:5	0.769231	18:4	0.75	1:8	0.750354
14:25	1	1:3	0.8	1:3	0.8	17:8	0.818182	1:11	0.769231	16:35	0.75	4:7	0.744054
14:20	1	1:26	0.8	17:4	0.790123	10:8	0.818182	35:6	0.75	12:6	0.75	7:8	0.741368
12:36	1	17:5	0.790123	10:4	0.790123	1:18	0.818182	16:35	0.75	12:16	0.75	10:5	0.719127
10:18	1	17:4	0.790123	26:4	0.777778	1:17	0.818182	12:35	0.75	1:18	0.75	5:7	0.718823
1:17	0.857143	18:5	0.777778	17:26	0.777778	1:10	0.818182	18:5	0.736364	10:17	0.736364	1:18	0.715711
17:3	0.833333	18:4	0.777778	10:26	0.777778	17:26	0.777778	17:8	0.715976	18:5	0.711111	35:6	0.708333
17:18	0.833333	10:17	0.777778	7:8	0.765625	10:26	0.777778	1:8	0.715976	10:18	0.711111	17:26	0.704921
10:17	0.833333	7:8	0.765625	3:8	0.765625	11:36	0.765625	5:7	0.714286	28:5	0.7	17:7	0.696379
5:7	0.8	3:8	0.765625	3:7	0.765625	35:6	0.75	11:7	0.714286	10:28	0.7	14:6	0.694444
4:7	0.8	3:7	0.765625	35:6	0.75	16:35	0.75	10:5	0.711111	10:26	0.7	10:26	0.691217
3:5	0.8	26:8	0.765625	16:35	0.75	12:6	0.75	10:11	0.711111	7:8	0.699301	38:9	0.688889
3:4	0.8	11:7	0.765625	12:6	0.75	12:16	0.75	28:5	0.7	18:7	0.692308	18:8	0.686026
18:5	0.8	35:6	0.75	12:16	0.75	5:7	0.736364	17:18	0.699301	4:5	0.675	10:4	0.682445
18:4	0.8	16:35	0.75	17:5	0.711111	4:7	0.736364	1:18	0.699301	10:4	0.675	17:5	0.680651
18:28	0.8	15:26	0.75	10:5	0.711111	3:7	0.736364	10:17	0.692308	17:8	0.669421	17:8	0.677448
10:5	0.8	12:6	0.75	26:5	0.7	11:8	0.727273	1:10	0.692308	14:9	0.666667	26:5	0.675529
10:4	0.8	12:16	0.75	1:26	0.7	11:7	0.727273	29:35	0.666667	14:6	0.666667	10:7	0.670328
10:28	0.8	10:28	0.714286	4:7	0.680556	1:11	0.727273	25:9	0.666667	14:38	0.666667	26:4	0.669231
d28:39	0.75	1:18	0.7	3:4	0.680556	17:5	0.711111	21:29	0.666667	14:16	0.666667	12:16	0.667824
d28:29	0.75	1:10	0.7	18:4	0.680556	17:4	0.711111	2:33	0.666667	13:6	0.666667	14:9	0.666667
d28:16	0.75	5:7	0.680556	17:8	0.680556	15:5	0.711111	14:9	0.666667	13:16	0.666667	1:3	0.657577
5:8	0.75	4:7	0.680556	17:7	0.680556	15:4	0.711111	14:38	0.666667	18:8	0.646465	16:29	0.657407
4:8	0.75	3:5	0.680556	17:3	0.680556	10:5	0.711111	14:35	0.666667	17:18	0.646465	16:35	0.652778
15:5	0.75	3:4	0.680556	10:8	0.680556	10:4	0.711111	18:7	0.649351	26:8	0.636364	10:28	0.649471
15:4	0.75	17:8	0.680556	10:7	0.680556	26:5	0.7	26:28	0.642857	17:28	0.636364	26:8	0.649432
11:30	0.75	17:7	0.680556	10:3	0.680556	26:4	0.7	10:7	0.642857	17:26	0.636364	12:6	0.649306
1:3	0.714286	17:3	0.680556	38:9	0.666667	11:17	0.680556	3:4	0.641026	d28:3	0.6	3:7	0.646629
1:18	0.714286	38:9	0.666667	38:6	0.666667	10:11	0.680556	17:3	0.641026	10:11	0.6	17:18	0.642578
1:10	0.714286	38:6	0.666667	32:6	0.666667	38:9	0.666667	1:3	0.641026	36:4	0.592593	18:7	0.638913
35:36	0.666667	32:6	0.666667	32:39	0.666667	38:6	0.666667	11:5	0.64	28:4	0.583333	29:32	0.638889
22:35	0.666667	32:39	0.666667	29:6	0.666667	29:6	0.666667	11:36	0.64	26:4	0.583333	21:32	0.638889
21:8	0.666667	29:6	0.666667	29:39	0.666667	29:39	0.666667	17:5	0.623077	1:28	0.583333	10:18	0.636867
21:39	0.666667	29:39	0.666667	21:6	0.666667	29:32	0.666667	15:8	0.623077	1:26	0.583333	1:26	0.632037
21:36	0.666667	21:6	0.666667	21:39	0.666667	25:9	0.666667	11:8	0.623077	5:8	0.581818	38:6	0.62963
Bottom 50 pairs with lowest TsOC scores
23:32	0	10:32	0.0714286	15:16	0.0555556	27:34	0.0666667	15:2	0.05	15:21	0.030303	21:26	0.0919643
23:3	0	10:29	0.0714286	14:17	0.0555556	27:30	0.0666667	14:15	0.05	15:16	0.030303	17:29	0.0914271
23:28	0	10:21	0.0714286	13:15	0.0555556	16:34	0.0666667	13:27	0.05	28:34	0.0285714	28:33	0.090873
23:25	0	10:14	0.0714286	10:38	0.0555556	13:34	0.0666667	11:23	0.05	27:36	0.0277778	30:38	0.0907407
22:33	0	28:33	0.0666667	10:32	0.0555556	13:30	0.0666667	d28:33	0.047619	23:4	0.0277778	23:35	0.0902778
22:27	0	26:38	0.0625	10:29	0.0555556	25:36	0.0625	28:38	0.047619	18:27	0.0277778	14:26	0.089881
21:27	0	26:32	0.0625	10:21	0.0555556	23:36	0.0625	28:33	0.047619	1:33	0.0277778	33:6	0.087963
21:23	0	26:29	0.0625	10:14	0.0555556	11:23	0.0625	21:28	0.047619	1:23	0.0277778	22:8	0.087186
20:34	0	21:26	0.0625	28:30	0.05	18:38	0.0555556	18:25	0.0454545	33:7	0.025641	30:9	0.0855556
20:33	0	14:26	0.0625	26:6	0.047619	18:25	0.0555556	18:23	0.0454545	23:7	0.025641	15:16	0.0834456
20:30	0	d28:33	0.0555556	26:39	0.047619	18:23	0.0555556	14:18	0.0454545	10:27	0.025	21:25	0.0833333
20:27	0	17:38	0.0555556	26:33	0.047619	17:38	0.0555556	23:3	0.0416667	15:27	0.0227273	12:23	0.0833333
20:23	0	17:32	0.0555556	26:27	0.047619	17:29	0.0555556	21:26	0.0416667	d28:33	0	15:20	0.0833333
18:27	0	17:29	0.0555556	16:26	0.047619	17:21	0.0555556	16:34	0.0416667	d28:2	0	14:18	0.081749
18:23	0	17:21	0.0555556	13:26	0.047619	15:38	0.0555556	27:39	0.04	34:9	0	23:36	0.0813602
17:27	0	15:6	0.0555556	27:8	0.0416667	15:29	0.0555556	23:8	0.0384615	34:39	0	10:14	0.0813492
17:23	0	15:39	0.0555556	27:7	0.0416667	15:21	0.0555556	23:4	0.0384615	34:38	0	15:35	0.0808923
16:27	0	15:33	0.0555556	27:3	0.0416667	14:18	0.0555556	17:29	0.0384615	33:9	0	15:39	0.0801122
15:34	0	15:27	0.0555556	23:8	0.0416667	14:17	0.0555556	14:17	0.0384615	33:39	0	22:4	0.0766619
15:33	0	15:16	0.0555556	23:7	0.0416667	14:15	0.0555556	1:23	0.0384615	33:38	0	d28:33	0.0760582
15:27	0	14:17	0.0555556	23:3	0.0416667	10:38	0.0555556	10:21	0.037037	3:33	0	34:6	0.075
15:23	0	13:15	0.0555556	22:8	0.0416667	10:29	0.0555556	28:30	0.0357143	27:9	0	15:30	0.0749579
14:34	0	28:34	0.05	18:27	0.0416667	10:21	0.0555556	23:7	0.0357143	27:6	0	2:28	0.0742857
14:33	0	28:30	0.05	18:23	0.0416667	10:14	0.0555556	27:34	0.0333333	27:5	0	33:35	0.0740741
14:30	0	33:36	0.047619	18:22	0.0416667	23:5	0.05	22:5	0.0333333	27:39	0	28:30	0.0711111
14:27	0	18:27	0.047619	15:35	0.0416667	23:4	0.05	22:36	0.0333333	27:38	0	12:15	0.0702441
14:23	0	18:23	0.047619	15:30	0.0416667	23:3	0.05	15:35	0.0333333	27:35	0	14:17	0.0695416
13:6	0	18:22	0.047619	13:18	0.0416667	d28:33	0.047619	15:33	0.0333333	27:33	0	13:15	0.0674523
13:38	0	13:18	0.047619	12:15	0.0416667	26:6	0.047619	15:22	0.0333333	27:32	0	11:23	0.0673611
13:32	0	10:27	0.047619	28:34	0.04	26:39	0.047619	15:21	0.0333333	27:29	0	27:33	0.0666667
13:27	0	10:22	0.047619	27:4	0.037037	26:33	0.047619	11:22	0.0333333	27:28	0	20:28	0.0625
13:25	0	27:8	0.0416667	27:36	0.037037	26:32	0.047619	18:22	0.030303	25:34	0	11:20	0.0625
13:23	0	27:7	0.0416667	23:4	0.037037	26:27	0.047619	22:8	0.025641	25:33	0	13:18	0.0621312
13:20	0	27:3	0.0416667	22:4	0.037037	16:26	0.047619	17:22	0.025641	25:30	0	d28:2	0.0619048
13:15	0	26:27	0.0416667	17:27	0.037037	13:26	0.047619	26:27	0.025	25:29	0	27:30	0.0611111
13:14	0	23:8	0.0416667	17:22	0.037037	23:8	0.0454545	15:6	0.025	25:27	0	18:25	0.0594276
12:27	0	23:7	0.0416667	10:27	0.037037	23:7	0.0454545	15:30	0.025	23:34	0	15:27	0.0584792
12:23	0	23:3	0.0416667	10:22	0.037037	1:23	0.0454545	12:15	0.025	23:33	0	17:27	0.056747
11:6	0	22:8	0.0416667	26:35	0.0357143	27:36	0.0416667	10:27	0.0222222	23:28	0	28:34	0.0561905
11:38	0	15:35	0.0416667	26:30	0.0357143	11:27	0.0416667	27:5	0.02	23:26	0	25:29	0.0555556
11:35	0	15:34	0.0416667	12:26	0.0357143	28:34	0.04	27:36	0.02	23:25	0	22:25	0.0555556
11:32	0	15:30	0.0416667	27:5	0.0333333	18:27	0.037037	34:9	0	22:34	0	27:4	0.054867
11:27	0	12:15	0.0416667	23:5	0.0333333	18:22	0.037037	33:9	0	22:33	0	27:7	0.0531885
11:25	0	11:27	0.0416667	22:5	0.0333333	17:27	0.037037	33:38	0	22:28	0	1:27	0.0531274
11:20	0	27:5	0.037037	15:34	0.0333333	17:22	0.037037	27:9	0	22:26	0	23:34	0.0527778
11:14	0	27:4	0.037037	1:27	0.0333333	15:27	0.037037	27:6	0	22:25	0	20:26	0.05
10:27	0	23:5	0.037037	1:23	0.0333333	13:18	0.037037	27:38	0	21:27	0	10:20	0.05
10:23	0	23:4	0.037037	d28:27	0	10:27	0.037037	27:35	0	21:25	0	27:34	0.05
1:27	0	22:5	0.037037	34:9	0	10:22	0.037037	27:32	0	2:9	0	15:33	0.0487654
1:23	0	22:4	0.037037	34:38	0	26:35	0.0357143	27:29	0	2:6	0	11:27	0.0480556
All pairwise scores can be accessed at http://edgedb.umassmed.edu/IndexAction.do
